# Supplementary material for: Electrochemical sensors for β-adrenoceptor agonist isoprenaline analysis in human urine and serum samples using manganese cobalt oxide-modified glassy carbon electrode
Source: Royal Society of Chemistry journal article supplement (doi:10.1039/d1nj01009c), 2021-01-01
Supplement: d1nj01009c1.pdf [file d1nj01009c1.pdf]

**Electrochemical sensors for  $\beta$ -adrenoceptor agonist isoprenaline analysis in human urine and serum samples using manganese cobalt oxide modified glassy carbon electrode**

Natesan Manjula, Shen-Ming Chen<sup>\*a</sup>

<sup>a</sup>Electroanalysis and Bioelectrochemistry Lab, Department of Chemical Engineering and Biotechnology, National Taipei University of Technology, No.1, Section 3, Chung-Hsiao East 8 Road, Taipei 106, Taiwan, ROC

**Corresponding Author:**

\*S.M. Chen, Fax: +886 227025238, Tel: +886 227017147, E-mail: [smchen78@ms15.hinet.net](mailto:smchen78@ms15.hinet.net)

**Table. S1** Determination of ISPT at MCO/GCE in human urine and serum sample

| <b>Samples</b> | <b>Added (<math>\mu\text{M}</math>)</b> | <b>Found (<math>\mu\text{M}</math>)</b> | <b>Recovery (%)</b> | <b>RSD (%)</b> |
|----------------|-----------------------------------------|-----------------------------------------|---------------------|----------------|
| <b>Urine</b>   | 5                                       | 4.95                                    | 99                  | 1.24           |
|                | 10                                      | 10.09                                   | 100.9               | 1.85           |
|                | 15                                      | 15.18                                   | 101.2               | 2.54           |
|                | 20                                      | 20.12                                   | 100.6               | 2.84           |
|                | 25                                      | 25.17                                   | 100.7               | 3.88           |
| <b>Serum</b>   | 5                                       | 4.98                                    | 99.6                | 1.26           |
|                | 10                                      | 9.97                                    | 99.7                | 1.96           |
|                | 15                                      | 15.05                                   | 100.3               | 2.81           |
|                | 20                                      | 20.19                                   | 100.9               | 3.09           |
|                | 25                                      | 25.08                                   | 100.3               | 3.75           |
